# Supplementary material for: Effect of dopant concentration and ambient temperature on the pseudo-capacitance behavior of novel copper doped bismuth layered double hydroxide
Source: Royal Society of Chemistry journal article supplement (doi:10.1039/d5ra08811a), 2026-01-01
Supplement: d5ra08811a1.pdf [file d5ra08811a1.pdf]

## Supporting information

### Effect of Dopant Concentration and Ambient Temperature on the Pseudo-capacitance Behavior of Novel Copper Doped Bismuth Layered Double Hydroxide

*Muhammad Farooq Rasheed<sup>1</sup>, Yasir Altaf<sup>1</sup>, Muhammad Ramzan Khawar<sup>3</sup>, Sajad Hussain<sup>2\*</sup>, Najam Ul Hassan<sup>2</sup>, Razan A. Alshgari<sup>4</sup>, Mohamed Ouladsmane<sup>4</sup>, Dongwhi Choi<sup>3\*</sup>, Awais ahmad<sup>4\*</sup>*

*<sup>1</sup>Department of Chemistry, Division of Science and Technology, University of Education, Lahore 54000, Pakistan.*

*<sup>2</sup>Department of Physics, Division of Science and Technology, University of Education, Lahore 54000, Pakistan.*

*<sup>3</sup>Department of Mechanical Engineering (Integrated Engineering Program), Kyung Hee University, 1732 Deogyeong-Daero, Yongin, Gyeonggi, 17104, South Korea*

*<sup>4</sup>Department of Chemistry, P. O. Box 2455, College of Science, King Saud University, Riyadh 11451, Saudi Arabia*

*<sup>5</sup>Department of Chemistry, The University of Lahore, Lahore, Pakistan*

### Corresponding author:

Sajad Hussain\* ([sajad.hussain@ue.edu.pk](mailto:sajad.hussain@ue.edu.pk)) dongwhi choi\* ([dongwhi.choi@khu.ac.kr](mailto:dongwhi.choi@khu.ac.kr)) Awais ahmad\* ([awaisahmed@gcuf.edu.pk](mailto:awaisahmed@gcuf.edu.pk))

**Table S1:** Measurement of resistance from EIS data for three electrodes

| Electrode | Solution resistance (Ohm) | Charge transfer resistance (Ohm) | Series resistance (Ohm) |
|-----------|---------------------------|----------------------------------|-------------------------|
| UBL       | 0.29                      | 10.5                             | 10.84                   |
| 1 % CBL   | 0.31                      | 4.0                              | 4.31                    |
| 2.5 % CBL | 0.29                      | 3.92                             | 4.21                    |
| 5 % CBL   | 0.21                      | 22.12                            | 22.33                   |

**Table S2:** Comparison of current research with similar materials

| Structure                                | Type       | Electrolyte | Energy (Wh kg <sup>-1</sup> ) | Power (W kg <sup>-1</sup> ) | References |
|------------------------------------------|------------|-------------|-------------------------------|-----------------------------|------------|
| N, O codoped carbon nanosphere           | Symmetric  | KOH         | 6.5                           | 425                         | [1]        |
| Bi-Oxychloride/Mxene                     | Symmetric  | KOH         | 15.2                          | 567.4                       | [2]        |
| Bi <sub>2</sub> O <sub>3</sub> /Graphite | Asymmetric | KOH         | 11                            | 720                         | [3]        |

|                                 |            |     |       |     |           |
|---------------------------------|------------|-----|-------|-----|-----------|
| Ni-Bismuth LDH                  | Symmetric  | KOH | 43    | 725 | [4]       |
| NiCo-LDHs//AC                   | Asymmetric | KOH | 74.37 | 492 | [5]       |
| NiCo-LDHs//CNT                  | Asymmetric | KOH | 36.1  | 649 | [6]       |
| MnO <sub>2</sub> @CoNi-LDHs//AC | Asymmetric | KOH | 40.9  | 400 | [7]       |
| Cu-Bismuth LDH                  | Symmetric  | KOH | 65.5  | 905 | This work |

**Table S3:** Measurement of resistance from EIS data for two electrodes at different temperatures

| Temperature | Solution resistance (Ohm) | Charge transfer resistance (Ohm) | Series resistance (Ohm) |
|-------------|---------------------------|----------------------------------|-------------------------|
| 35          | 2.25                      | 19.01                            | 21.06                   |
| 45          | 2.22                      | 11.12                            | 13.34                   |
| 55          | 2.29                      | 70                               | 70.29                   |

1. Hu, M., et al., *Emerging 2D MXenes for supercapacitors: status, challenges and prospects*. Chemical Society Reviews, 2020. **49**(18): p. 6666-6693.
2. Gogotsi, Y. and Q. Huang, *MXenes: two-dimensional building blocks for future materials and devices*. 2021, ACS Publications. p. 5775-5780.
3. Chodankar, N.R., et al., *True meaning of pseudocapacitors and their performance metrics: asymmetric versus hybrid supercapacitors*. Small, 2020. **16**(37): p. 2002806.
4. Attia, S.Y., et al., *A two-dimensional nickel-doped bismuth-layered double hydroxide structure as a bifunctional efficient electrode material for symmetric supercapacitors*. Sustainable Materials and Technologies, 2023. **36**: p. e00595.
5. Liu, H., et al., *Controlled microstructure in two dimensional Ni-Co LDH nanosheets-crosslinked network for high performance supercapacitors*. Advanced Powder Technology, 2019. **30**(6): p. 1239-1246.
6. Ramachandran, R., et al., *Construction of NiCo-layered double hydroxide microspheres from Ni-MOFs for high-performance asymmetric supercapacitors*. ACS Applied Energy Materials, 2020. **3**(7): p. 6633-6643.
7. Luo, H., et al., *Hierarchical design of hollow Co-Ni LDH nanocages strung by MnO<sub>2</sub> nanowire with enhanced pseudocapacitive properties*. Energy Storage Materials, 2019. **19**: p. 370-378.
